# Supplementary material for: Modulation of Intestinal Epithelial Permeability in Differentiated Caco-2 Cells Exposed to Aflatoxin M1 and Ochratoxin A Individually or Collectively
Source: Toxins (Basel). 2017 Dec 27;10(1):13. doi: 10.3390/toxins10010013 (PMC5793100; doi:10.3390/toxins10010013)
Supplement: Supplementary file 1 [file toxins-10-00013-s001.pdf]

# Supplementary Materials: Modulation of Intestinal Epithelial Permeability in Differentiated Caco-2 Cells Exposed to Aflatoxin M1 and Ochratoxin A Individually or Collectively

Yanan Gao, Songli Li, Jiaqi Wang, Chaochao Luo, Shengguo Zhao and Nan Zheng

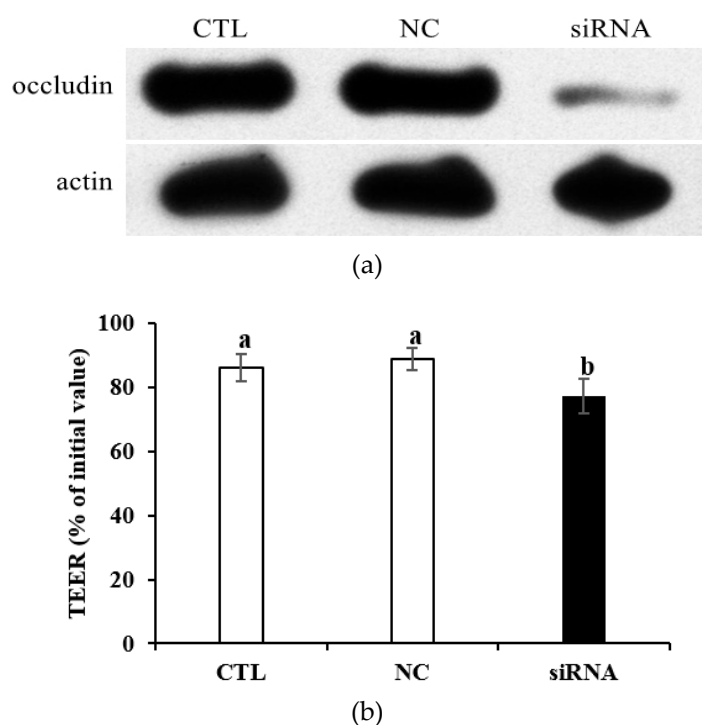

**Figure S1.** Mycotoxins disrupt intestinal epithelial permeability by affecting occludin expression. **(a)** Immunoblot of occludin in differentiated Caco-2 cells after transfection with occludin siRNA to validate the knockdown level. **(b)** Changes in TEER values in differentiated Caco-2 cells after occludin knockdown (siRNA) for 48 h compared with the initial value. Results are expressed as the mean  $\pm$  S.E.M. of three independent experiments with three replicates. Different letters (a, b) indicate significant differences in TEER values ( $p < 0.05$ ). NC, negative control.

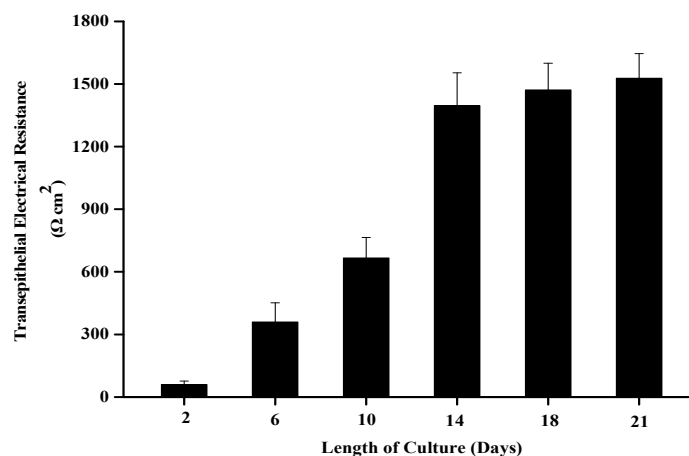

**Figure S2.** Transepithelial electrical resistance values ( $\Omega \times \text{cm}^2$ ) in differentiated Caco-2 cells were measured at different time points until 21 days.

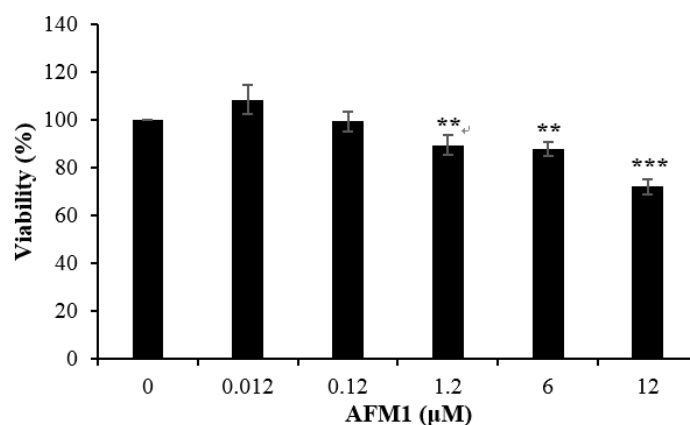

(a)

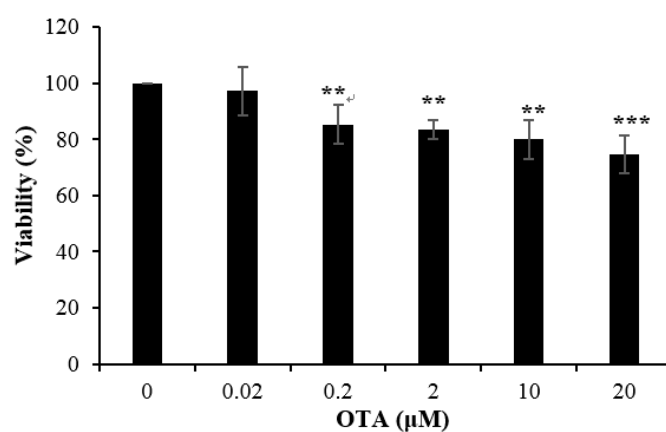

(b)

**Figure S3.** Concentration-response bar charts for AFM1 (a) and OTA (b) in Caco-2 cells after 48 h of exposure. Results are expressed as the mean  $\pm$  S.E.M. of three independent experiments with five replicates. \*  $p < 0.05$ ; \*\*  $p < 0.001$ ; and \*\*\*  $p < 0.000$  indicates a significant difference from control cells.
